# Supplementary material
Source: Research Square preprint supplement (doi:10.21203/rs.3.rs-9308281/v1)
Supplement: Supplementary file 1 [file cac3ed410db95fd00d23976e.xlsx]

## Sheet: Sheet1
患者编号	年龄	性别	支架类型	嵌顿处输尿管壁厚度(mm)	嵌顿侧别	嵌顿部位	结石直径	B超肾盂分离前后径	支架拔出后	拔出支架1月	拔出支架3月	术后3月APD变化值	肾积水程度	术前尿培养阳性	合并息肉	术前肌酐水平(umol/L)	支架置入术后肌酐水平（umol/L）	术后一月肌酐	肌酐变化值	腰痛 VAS 评分	USSQ 血尿评分	USSQ 膀胱刺激症状评分	QOL 评分	支架管留置时间	血红蛋白变化值
1	39	男	海马	4.1	左侧	下	1.4	33	15	22	20	13	重度	阳性	是	155	145	135	20	1	1	3	2	38	7
2	61	女	海马	3.6	右侧	中	1.2	27	21	15	9	18	中度	阳性	是	115	79	77	38	1	2	1	1	45	9
3	65	男	海马	3.2	左侧	上	1	11	8	7	0	11	轻度	阴性	否	68	65	64	4	2	2	2	2	39	3
4	41	女	海马	3.4	右侧	下	1.3	27	22	21	10	17	中度	阴性	是	108	98	92	16	2	1	3	3	30	6
5	48	男	海马	2.8	左侧	中	0.9	14	9	9	0	14	轻度	阳性	否	105	78	82	23	2	1	2	1	44	3
6	49	女	海马	3.4	右侧	上	0.8	26	15	12	10	16	中度	阴性	是	120	88	92	28	1	1	2	1	59	2
7	42	女	海马	3.1	右侧	下	1.2	22	13	10	6	16	中度	阴性	是	108	96	92	16	2	1	2	3	36	1
8	54	男	海马	2.7	左侧	中	1	19	10	11	10	9	中度	阴性	否	111	101	102	9	3	2	3	3	29	-2
9	62	女	海马	3.5	右侧	上	1.1	25	8	9	0	25	中度	阴性	是	202	152	142	60	2	2	3	2	41	8
10	55	女	海马	3.7	左侧	下	1.5	32	15	24	20	12	重度	阴性	是	134	130	120	14	2	2	3	4	15	12
11	53	男	海马	3.7	右侧	中	1.4	31	21	24	25	6	重度	阳性	是	106	103	89	17	2	1	1	1	52	10
12	57	男	海马	3.6	右侧	上	1.2	37	16	25	26	11	重度	阴性	是	122	102	88	34	1	3	1	3	25	12
13	55	女	海马	3.1	左侧	下	0.8	11	0	7	0	11	轻度	阴性	否	78	74	76	2	0	2	3	3	30	5
14	42	男	海马	3.5	右侧	中	0.9	14	10	10	0	14	轻度	阴性	是	136	125	110	26	0	1	2	1	53	5
15	55	男	海马	2.5	左侧	上	0.7	10	0	6	0	10	轻度	阴性	否	66	63	62	4	2	2	3	3	20	4
16	61	女	海马	3.4	右侧	下	1	26	14	10	12	14	中度	阴性	否	96	77	75	21	0	1	2	2	40	3
17	63	男	海马	3.6	左侧	中	1.6	19	7	10	0	19	中度	阳性	是	65	60	62	3	1	1	2	1	60	9
18	43	女	海马	3.5	右侧	上	1.2	25	10	11	10	15	中度	阴性	否	163	144	124	39	2	2	1	3	32	6
19	57	女	海马	3.8	左侧	上	1.4	33	25	30	29	4	重度	阴性	是	99	102	92	7	2	2	2	2	38	12
20	60	男	海马	3	右侧	下	0.7	11	0	6	0	11	轻度	阴性	否	59	58	58	1	2	2	2	3	18	10
21	35	女	海马	3.1	右侧	中	0.9	22	9	10	11	11	中度	阴性	是	133	101	99	34	0	1	3	2	36	2
22	39	男	海马	3.8	左侧	上	1.5	20	5	6	6	14	中度	阳性	是	142	120	119	23	2	2	2	1	49	4
23	47	女	海马	3	右侧	下	1	12	7	8	0	12	轻度	阴性	否	78	82	75	3	1	1	3	2	39	4
24	39	男	海马	3.6	左侧	中	0.9	23	10	12	10	13	中度	阴性	否	176	115	89	87	0	1	2	2	50	-5
25	41	女	海马	3.2	右侧	上	1.4	14	10	15	6	8	轻度	阳性	是	142	140	144	-2	1	3	2	1	53	9
26	35	女	海马	2.3	左侧	下	0.6	13	0	5	0	13	轻度	阴性	否	86	75	77	9	0	2	4	3	26	7
27	46	女	标准	2.9	右侧	中	1	15	11	9	10	5	中度	阴性	是	163	128	111	52	1	1	3	2	55	6
28	59	男	标准	3.3	右侧	上	1.5	13	6	5	0	13	轻度	阴性	是	78	77	79	-1	0	2	3	2	52	7
29	55	女	标准	3	左侧	下	1.4	14	8	7	7	7	轻度	阴性	否	62	60	61	1	1	2	2	2	37	6
30	51	男	标准	2.7	右侧	中	1.6	11	10	10	9	2	轻度	阴性	是	75	74	72	3	2	1	3	2	39	3
31	63	女	标准	3.4	左侧	上	1.4	26	13	18	15	11	中度	阴性	是	163	105	102	61	2	1	2	1	52	9
32	62	男	标准	3.2	右侧	下	1.2	27	10	15	12	15	中度	阳性	是	108	82	84	24	1	3	3	3	27	6
33	58	女	标准	2.8	左侧	中	1.2	14	10	12	12	2	轻度	阴性	是	62	65	64	-2	2	2	2	1	55	9
34	64	女	标准	3.2	右侧	上	1.1	13	8	10	10	3	轻度	阳性	是	165	156	153	12	3	2	3	3	25	10
35	60	男	标准	3.3	左侧	中	1.5	14	12	13	12	2	轻度	阴性	是	48	49	42	6	2	1	2	2		5
36	50	男	标准	2.8	右侧	上	1.3	11	0	8	0	11	轻度	阴性	否	49	45	42	7	1	1	2	1	58	10
37	49	女	标准	3	左侧	上	1.2	14	12	10	10	4	轻度	阴性	是	180	162	155	25	1	2	1	1	57	6
38	37	女	标准	2.6	右侧	下	0.9	20	8	15	12	8	中度	阴性	否	66	62	60	6	0	2	3	2	44	-3
39	63	男	标准	2.7	右侧	中	0.9	14	6	8	6	8	轻度	阳性	否	109	105	86	23	1	3	2	3	24	10
40	46	女	标准	2.9	左侧	上	1	12	8	7	8	4	轻度	阴性	否	89	80	72	17	0	1	3	1	59	9
41	48	女	标准	2.7	右侧	下	1.1	23	15	16	10	13	中度	阳性	否	77	75	70	7	1	3	2	3	25	8
42	41	男	标准	3.4	左侧	中	1.2	29	15	20	20	9	中度	阴性	是	183	155	145	38	1	1	2	1	55	8
43	35	男	标准	3.6	右侧	上	1.3	35	15	30	26	9	重度	阳性	是	79	70	65	14	3	3	2	1	54	7
44	40	女	标准	3.8	左侧	下	1.5	31	16	25	20	11	重度	阴性	是	85	80	82	3	5	2	4	4	18	-5
45	46	男	标准	3.5	右侧	中	1.4	27	11	18	16	13	中度	阴性	是	177	154	135	42	1	2	2	2	43	6
46	61	女	标准	2.6	右侧	上	1.1	10	6	5	0	10	轻度	阴性	否	99	75	72	27	2	1	3	1	52	13
47	44	女	标准	3.7	左侧	下	1.5	40	28	35	30	10	重度	阳性	是	178	154	133	45	2	2	3	2	44	11
48	43	男	标准	3.1	右侧	中	1.3	25	15	18	15	10	中度	阴性	否	95	82	78	17	3	2	3	3	31	1
49	40	女	标准	2.7	左侧	上	1.2	14	11	7	0	14	轻度	阴性	否	82	78	66	16	4	3	2	4	19	16
50	36	男	标准	3	右侧	下	1.6	13	10	8	6	7	轻度	阳性	是	110	105	108	2	1	1	3	3	22	-6
51	50	女	标准	2.6	右侧	中	1.2	11	5	4	0	11	轻度	阴性	否	132	102	86	46	1	1	2	2	42	-8
53	35	女	标准	3.8	左侧	中	1.7	39	25	35	28	11	重度	阴性	是	165	126	125	40	3	2	3	3	32	0
