# Supplementary material
Source: Research Square preprint supplement (doi:10.21203/rs.3.rs-9308281/v1)
Supplement: Supplementary file 1 [file d4e61a92fa2f43895f130036.docx]

## Readme File for Supplementary Data

****Supplementary File:**** Data.xlsx

****Description:****
This Excel file contains the raw clinical data of patients included in the study. The dataset includes demographic information, perioperative parameters, and follow-up outcomes.

****Sheet Information:****

| **Sheet Name** | **Content** |
| --- | --- |
| Sheet1 | Primary dataset of all patients (N=52) |

****Variable Definitions (Column Headers):****

| **Column** | **Variable (English)** | **Variable (Chinese)** | **Description** |
| --- | --- | --- | --- |
| A | Patient ID | 患者编号 | Unique identifier for each patient |
| B | Age (years) | 年龄 | Patient age in years |
| C | Gender | 性别 | Male / Female |
| D | Stent type | 支架类型 | Flared-type/ Standard |
| E | Ureteral wall thickness at impaction site (mm) | 嵌顿处输尿管壁厚度(mm) | Measured at the site of impaction |
| F | Side of impaction | 嵌顿侧别 | Left / Right |
| G | Location of impaction | 嵌顿部位 | Upper / Middle / Lower ureter |
| H | Stone diameter (cm) | 结石直径 | Maximum stone diameter |
| I | Preoperative APD (mm) | B超肾盂分离前后径 | Anteroposterior diameter of renal pelvis before stenting |
| J | APD after stent removal (mm) | 支架拔出后 | APD at the time of stent removal |
| K | APD at 1 month post-removal (mm) | 拔出支架1月 | APD at 1 month after stent removal |
| L | APD at 3 months post-removal (mm) | 拔出支架3月 | APD at 3 months after stent removal |
| M | Change in APD at 3 months (mm) | 术后3月APD变化值 | Calculated as Column I - Column L |
| N | Hydronephrosis grade | 肾积水程度 | Mild / Moderate / Severe |
| O | Preoperative urine culture | 术前尿培养阳性 | Positive / Negative |
| P | Presence of polyps | 合并息肉 | Yes / No |
| Q | Preoperative creatinine (μmol/L) | 术前肌酐水平 | Baseline serum creatinine |
| R | Creatinine after stenting (μmol/L) | 支架置入术后肌酐水平 | Serum creatinine after stent placement |
| S | Creatinine at 1 month post-removal (μmol/L) | 术后一月肌酐 | Serum creatinine at 1 month after stent removal |
| T | Change in creatinine (μmol/L) | 肌酐变化值 | Calculated as Column Q - Column S |
| U | Low back pain VAS score | 腰痛 VAS 评分 | Visual Analog Scale score for low back pain |
| V | USSQ hematuria score | USSQ 血尿评分 | Ureteral Stent Symptom Questionnaire — hematuria domain |
| W | USSQ urinary symptoms score | USSQ 膀胱刺激症状评分 | USSQ — urinary symptoms domain |
| X | QOL score | QOL 评分 | Quality of Life score |
| Y | Stent indwelling time (days) | 支架管留置时间 | Duration of stent placement in days |
| Z | Change in hemoglobin (g/L) | 血红蛋白变化值 | Change in hemoglobin level from baseline |

****Supplementary File 2:****Flared-type stent__image.jpg,**KUB**-Flared-type stent__image.jpg

****Description:****
This image highlights the **flared-type** design of the **Flared-type** ureteral stent used in this study.

****Key Feature Shown in the Image:****

-
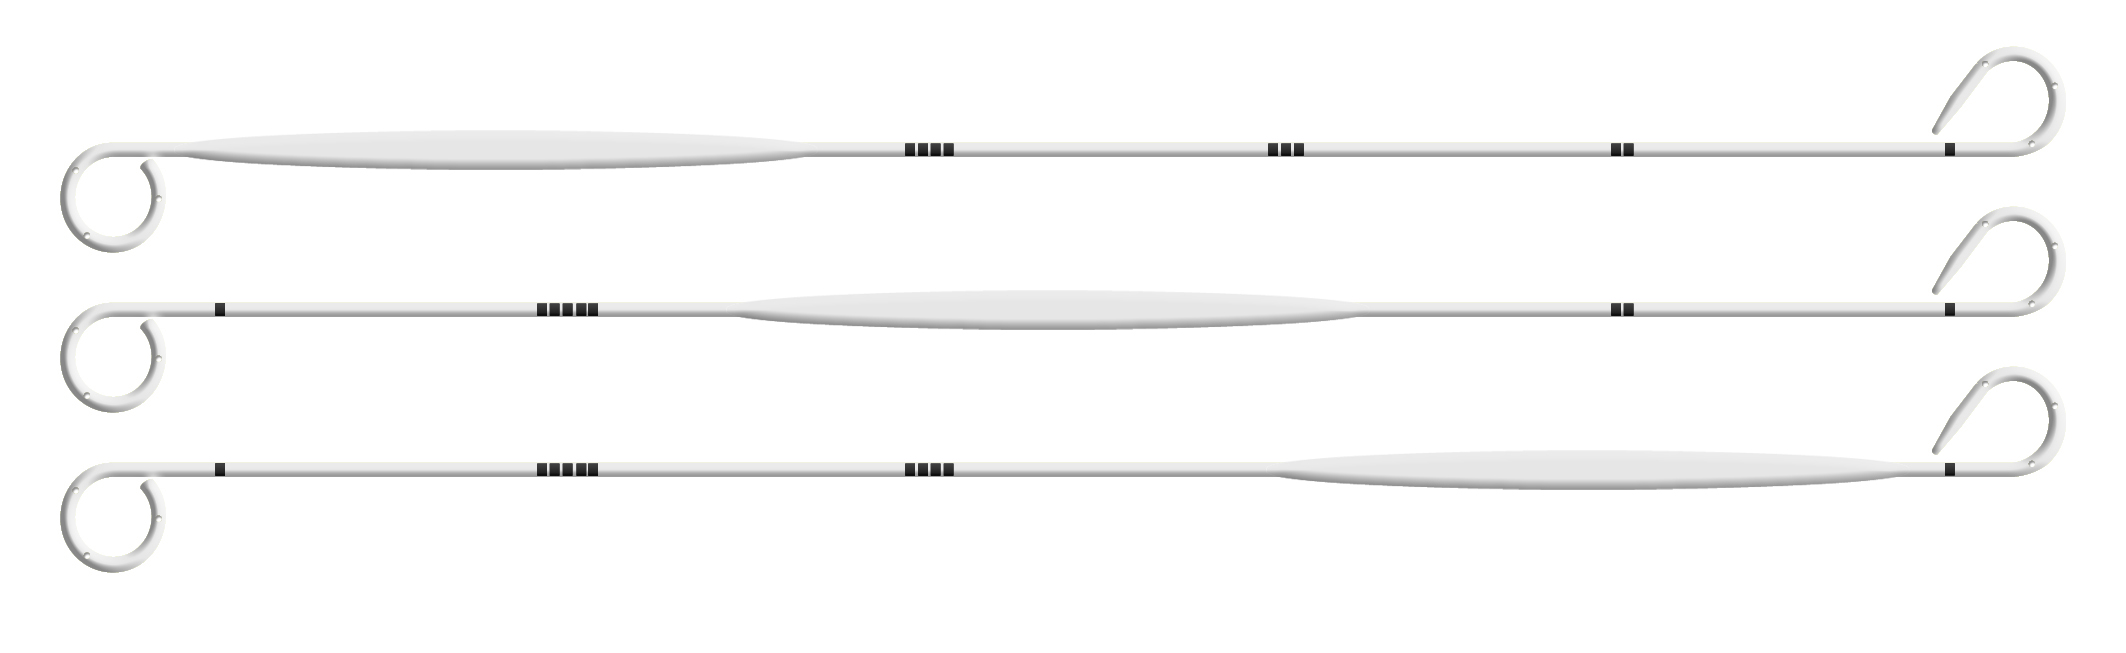


Flared-type ureteral stent configuration at the distal/proximal end of the stent


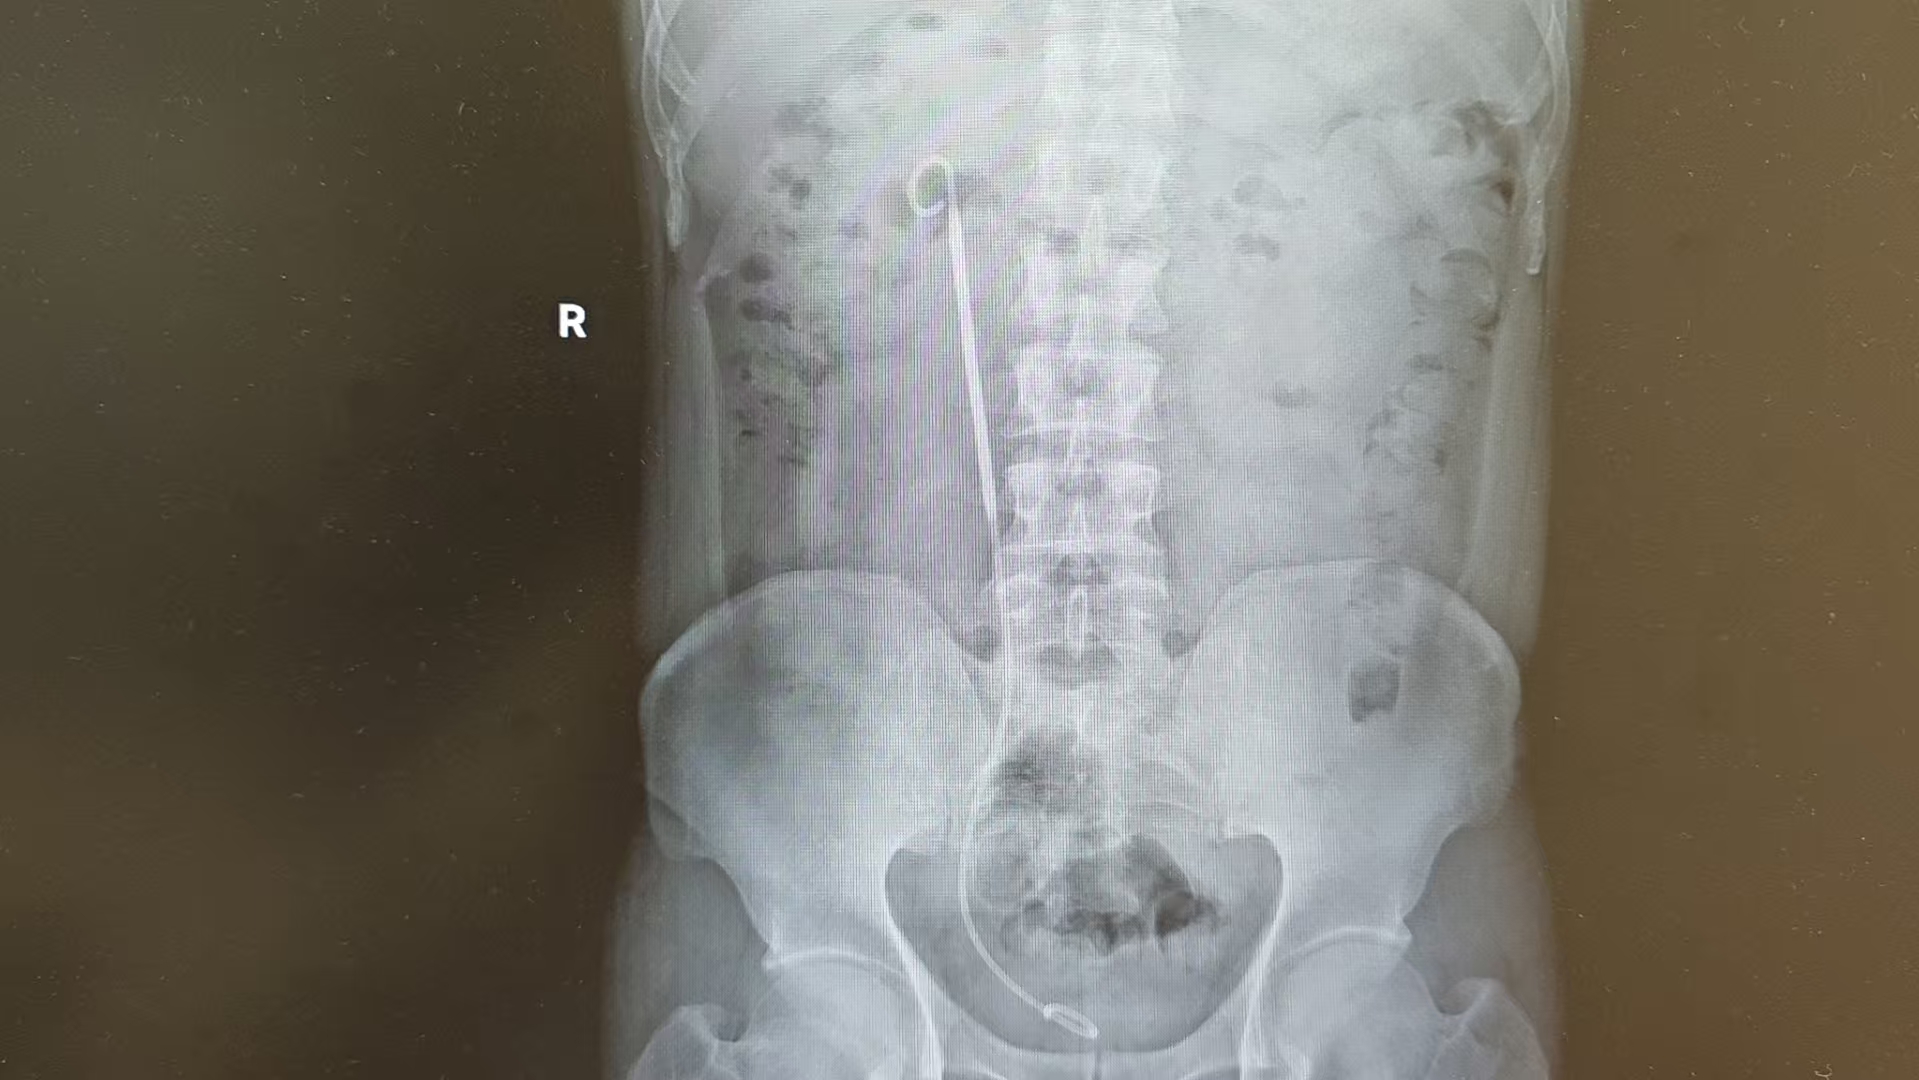


- A representative KUB image showing the position of theFlared-type ureteral stent after placement

****Correspondence:****
For any questions regarding this supplementary data, please contact the corresponding author.
